# Supplementary material
Source: Springer Nature journal article supplement (https://www.springermedizin.de/resource/supplementary/12985_2009_682_MOESM5_ESM.pdf/9608260)

**A**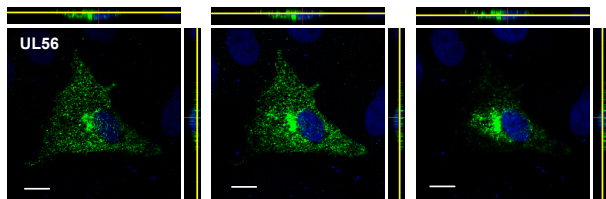**B**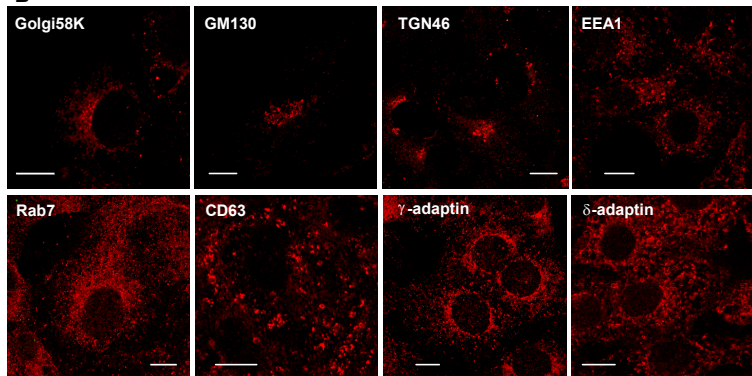**C**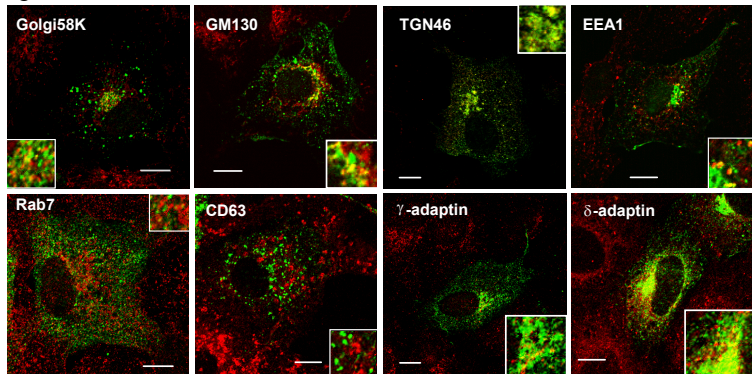

Supplement: MOESM5 [file 9608260]
